# Supplementary material
Source: PubMed Central journal article supplement (PMC5291040)
Supplement: supp_pp.16.01628_PP2016-01628DR1_Supplemental_Materialtbls.pdf [file supp_pp.16.01628_PP2016-01628DR1_Supplemental_Materialtbls.pdf]

1  
2  
3  
4  
5  
6  
7  
8  
9

**SUPPLEMENTAL DATA**

**Supplemental Tables**

**Table S1.** Gene content of plastid genomes of *Polytoma uvella* and diverse photosynthetic algae of the Order Chlamydomonadales

|                                 | <i>Pu</i> | <i>Cr</i> | <i>Cl</i> | <i>Ca</i> | <i>Ds</i> | <i>Og</i> | <i>Ch</i> | <i>HI</i> | <i>PI</i> | <i>Ep</i> |
|---------------------------------|-----------|-----------|-----------|-----------|-----------|-----------|-----------|-----------|-----------|-----------|
| <b>Size kb</b>                  | 234       | □□□       | 167       | 203       | 269       | 254       | 197       | 263       | 203       | 145       |
| <b>Gene</b>                     |           |           |           |           |           |           |           |           |           |           |
| <b>Photosystem II</b>           |           |           |           |           |           |           |           |           |           |           |
| <i>psbA</i>                     |           | ■         | ■         | ■         | ■         | ■         | ■         | ■         | ■         | ■         |
| <i>psbA</i>                     |           | ■         | ■         | ■         | ■         | ■         | ■         | ■         | ■         | ■         |
| <i>psbB</i>                     |           | ■         | ■         | ■         | ■         | ■         | ■         | ■         | ■         | ■         |
| <i>psbC</i>                     |           | ■         | ■         | ■         | ■         | ■         | ■         | ■         | ■         | ■         |
| <i>psbD</i>                     |           | ■         | ■         | ■         | ■         | ■         | ■         | ■         | ■         | ■         |
| <i>psbE</i>                     |           | ■         | ■         | ■         | ■         | ■         | ■         | ■         | ■         | ■         |
| <i>psbF</i>                     |           | ■         | ■         | ■         | ■         | ■         | ■         | ■         | ■         | ■         |
| <i>psbH</i>                     |           | ■         | ■         | ■         | ■         | ■         | ■         | ■         | ■         | ■         |
| <i>psbI</i>                     |           | ■         | ■         | ■         | ■         | ■         | ■         | ■         | ■         | ■         |
| <i>psbJ</i>                     |           | ■         | ■         | ■         | ■         | ■         | ■         | ■         | ■         | ■         |
| <i>psbK</i>                     |           | ■         | ■         | ■         | ■         | ■         | ■         | ■         | ■         | ■         |
| <i>psbL</i>                     |           | ■         | ■         | ■         | ■         | ■         | ■         | ■         | ■         | ■         |
| <i>psbM</i>                     |           | ■         | ■         | ■         | ■         | ■         | ■         | ■         | ■         | ■         |
| <i>psbN</i>                     |           | ■         | ■         | ■         | ■         | ■         | ■         | ■         | ■         | ■         |
| <i>psbTc</i>                    |           | ■         | ■         | ■         | ■         | ■         | ■         | ■         | ■         | ■         |
| <i>psbZ</i>                     |           | ■         | ■         | ■         | ■         | ■         | ■         | ■         | ■         | ■         |
| <i>psb30</i>                    |           | ■         | ■         |           |           |           |           |           |           |           |
| <b>Cytochrome <i>b6f</i></b>    |           |           |           |           |           |           |           |           |           |           |
| <i>petA</i>                     |           | ■         | ■         | ■         | ■         | ■         | ■         | ■         | ■         | ■         |
| <i>petB</i>                     |           | ■         | ■         | ■         | ■         | ■         | ■         | ■         | ■         | ■         |
| <i>petD</i>                     |           | ■         | ■         | ■         | ■         | ■         | ■         | ■         | ■         | ■         |
| <i>petG</i>                     |           | ■         | ■         | ■         | ■         | ■         | ■         | ■         | ■         | ■         |
| <i>petL</i>                     |           | ■         | ■         | ■         | ■         | ■         | ■         | ■         | ■         | ■         |
| <b>Photosystem I</b>            |           |           |           |           |           |           |           |           |           |           |
| <i>psaA</i>                     |           | ■         | ■         | ■         | ■         | ■         | ■         | ■         | ■         | ■         |
| <i>psaA</i>                     |           |           |           |           |           |           |           | ■         |           |           |
| <i>psaB</i>                     |           | ■         | ■         | ■         | ■         | ■         | ■         | ■         | ■         | ■         |
| <i>psaC</i>                     |           | ■         | ■         | ■         | ■         | ■         | ■         | ■         | ■         | ■         |
| <i>psaI</i>                     |           |           |           |           |           |           |           |           |           | ■         |
| <i>psaJ</i>                     |           | ■         | ■         | ■         | ■         | ■         | ■         | ■         | ■         | ■         |
| <i>psaM</i>                     |           |           |           |           |           |           |           |           |           | ■         |
| <b>ATP synthase</b>             |           |           |           |           |           |           |           |           |           |           |
| <i>atpA</i>                     |           | ■         | ■         | ■         | ■         | ■         | ■         | ■         | ■         | ■         |
| <i>atpB</i>                     |           | ■         | ■         | ■         | ■         | ■         | ■         | ■         | ■         | ■         |
| <i>atpB</i>                     |           |           |           |           | ■         |           |           |           |           |           |
| <i>atpE</i>                     |           | ■         | ■         | ■         | ■         | ■         | ■         | ■         | ■         | ■         |
| <i>atpF</i>                     |           | ■         | ■         | ■         | ■         | ■         | ■         | ■         | ■         | ■         |
| <i>atpH</i>                     |           | ■         | ■         | ■         | ■         | ■         | ■         | ■         | ■         | ■         |
| <i>atpI</i>                     |           | ■         | ■         | ■         | ■         | ■         | ■         | ■         | ■         | ■         |
| <b>Rubisco</b>                  |           |           |           |           |           |           |           |           |           |           |
| <i>rbcl</i>                     |           | ■         | ■         | ■         | ■         | ■         | ■         | ■         | ■         | ■         |
| <b>Chlorophyll biosynthesis</b> |           |           |           |           |           |           |           |           |           |           |
| <i>chlB</i>                     |           | ■         | ■         | ■         | ■         | ■         | ■         |           | ■         | ■         |

|      |  |   |   |   |   |   |   |  |   |   |
|------|--|---|---|---|---|---|---|--|---|---|
| chlI |  |   |   |   |   |   |   |  |   | ■ |
| chlL |  | ■ | ■ | ■ | ■ | ■ | ■ |  | ■ | ■ |
| chlL |  |   |   |   | ■ |   |   |  |   |   |
| chlN |  | ■ | ■ | ■ | ■ | ■ | ■ |  | ■ | ■ |

**Miscellaneous proteins**

---

|      |   |   |   |   |   |   |   |   |   |   |
|------|---|---|---|---|---|---|---|---|---|---|
| cemA |   | ■ | ■ | ■ | ■ | ■ | ■ | ■ | ■ | ■ |
| clpP | ■ | ■ | ■ | ■ | ■ | ■ | ■ | ■ | ■ | ■ |
| ccsA |   | ■ | ■ | ■ | ■ | ■ | ■ | ■ | ■ | ■ |
| ftsH | ■ | ■ | ■ | ■ | ■ | ■ | ■ | ■ | ■ | ■ |
| mind |   |   |   |   |   |   |   |   |   | ■ |
| accD |   |   |   |   |   |   |   |   |   | ■ |

**Conserved proteins**

---

|       |   |   |   |   |   |   |   |   |   |   |
|-------|---|---|---|---|---|---|---|---|---|---|
| ycf1  | ■ | ■ | ■ | ■ | ■ | ■ | ■ | ■ | ■ | ■ |
| ycf3  |   | ■ | ■ | ■ | ■ | ■ | ■ | ■ | ■ | ■ |
| ycf4  |   | ■ | ■ | ■ | ■ | ■ | ■ | ■ | ■ | ■ |
| ycf12 |   | ■ | ■ | ■ | ■ | ■ | ■ | ■ | ■ | ■ |
| ycf62 |   |   |   |   |   |   |   |   |   | ■ |
| ycf20 |   |   |   |   |   |   |   |   |   | ■ |

**Ribosomal Proteins**

**Large subunit**

---

|       |   |   |   |   |   |   |   |   |   |   |
|-------|---|---|---|---|---|---|---|---|---|---|
| rpl12 |   |   |   |   |   |   |   |   |   | ■ |
| rpl14 | ■ | ■ | ■ | ■ | ■ | ■ | ■ | ■ | ■ | ■ |
| rpl16 | ■ | ■ | ■ | ■ | ■ | ■ | ■ | ■ | ■ | ■ |
| rpl19 |   |   |   |   |   |   |   |   |   | ■ |
| rpl2  | ■ | ■ | ■ | ■ | ■ | ■ | ■ | ■ | ■ | ■ |
| rpl20 | ■ | ■ | ■ | ■ | ■ | ■ | ■ | ■ | ■ | ■ |
| rpl23 |   | ■ | ■ | ■ | ■ | ■ | ■ | ■ | ■ | ■ |
| rpl32 |   |   |   | ■ |   |   | ■ | ■ | ■ | ■ |
| rpl36 | ■ | ■ | ■ | ■ | ■ | ■ | ■ | ■ | ■ | ■ |
| rpl5  | ■ | ■ | ■ | ■ | ■ | ■ | ■ | ■ | ■ | ■ |

**Small subunit**

---

|       |   |   |   |   |   |   |   |   |   |   |
|-------|---|---|---|---|---|---|---|---|---|---|
| rps2  |   | ■ | ■ | ■ | ■ | ■ | ■ | ■ | ■ | ■ |
| rps2  |   | ■ |   |   |   |   |   |   |   |   |
| rps3  | ■ | ■ | ■ | ■ | ■ | ■ | ■ | ■ | ■ | ■ |
| rps4  | ■ | ■ | ■ | ■ | ■ | ■ | ■ | ■ | ■ | ■ |
| rps7  | ■ | ■ | ■ | ■ | ■ | ■ | ■ | ■ | ■ | ■ |
| rps7  |   |   |   |   | ■ |   |   |   |   |   |
| rps8  | ■ | ■ | ■ | ■ | ■ | ■ | ■ | ■ | ■ | ■ |
| rps9  | ■ | ■ | ■ | ■ | ■ | ■ | ■ | ■ | ■ | ■ |
| rps11 | ■ | ■ | ■ | ■ | ■ | ■ | ■ | ■ | ■ | ■ |
| rps12 | ■ | ■ | ■ | ■ | ■ | ■ | ■ | ■ | ■ | ■ |
| rps14 | ■ | ■ | ■ | ■ | ■ | ■ | ■ | ■ | ■ | ■ |
| rps18 | ■ | ■ | ■ | ■ | ■ | ■ | ■ | ■ | ■ | ■ |
| rps19 | ■ | ■ | ■ | ■ | ■ | ■ | ■ | ■ | ■ | ■ |

**Transcription**

**RNA polymerase**

---

|        |   |   |   |   |   |   |   |   |   |   |
|--------|---|---|---|---|---|---|---|---|---|---|
| rpoA   | ■ | ■ | ■ | ■ | ■ | ■ | ■ | ■ | ■ | ■ |
| rpoB1  | ■ | ■ | ■ | ■ | ■ | ■ | ■ | ■ | ■ | ■ |
| rpoB2  | ■ | ■ | ■ | ■ | ■ | ■ | ■ | ■ | ■ | ■ |
| rpoC1A |   | ■ |   |   |   |   |   |   |   |   |
| rpoC1B |   | ■ |   |   |   |   |   |   |   |   |
| rpoC1  | ■ |   | ■ | ■ | ■ | ■ | ■ | ■ | ■ | ■ |
| rpoC2  | ■ | ■ | ■ | ■ | ■ | ■ | ■ | ■ | ■ | ■ |

|                       | <i>Pu</i> | <i>Cr</i> | <i>Cl</i> | <i>Ca</i> | <i>Ds</i> | <i>Og</i> | <i>Ch</i> | <i>HI</i> | <i>PI</i> | <i>Ep</i> |
|-----------------------|-----------|-----------|-----------|-----------|-----------|-----------|-----------|-----------|-----------|-----------|
| <b>Translation</b>    |           |           |           |           |           |           |           |           |           |           |
| tufA                  | ■         | ■         | ■         | ■         | ■         | ■         | ■         | ■         | ■         | ■         |
| infA                  |           |           |           |           |           |           |           |           |           | ■         |
| <b>Ribosomal RNAs</b> |           |           |           |           |           |           |           |           |           |           |
| <i>rrnF</i>           |           | ■         | ■         | ■         | ■         | ■         | ■         | ■         | ■         | ■         |
| <i>rrnL</i>           | ■         | ■         | ■         | ■         | ■         | ■         | ■         | ■         | ■         | ■         |
| <i>rrnS</i>           | ■         | ■         | ■         | ■         | ■         | ■         | ■         | ■         | ■         | ■         |
| <b>Transfer RNAs</b>  |           |           |           |           |           |           |           |           |           |           |
| trnA (UGC)            | ■         | ■         | ■         | ■         | ■         | ■         | ■         | ■         | ■         | ■         |
| trnA (UGC)            |           | ■         | ■         | ■         | ■         | ■         | ■         | ■         | ■         | ■         |
| trnC (GCA)            | ■         | ■         | ■         | ■         | ■         | ■         | ■         | ■         | ■         | ■         |
| trnD (GUC)            | ■         | ■         | ■         | ■         | ■         | ■         | ■         | ■         | ■         | ■         |
| trnE (UUC)            | ■         | ■         | ■         | ■         | ■         | ■         | ■         | ■         | ■         | ■         |
| trnE (UUC)            |           | ■         | ■         | ■         | ■         | ■         | ■         | ■         | ■         | ■         |
| trnF (GAA)            |           | ■         | ■         | ■         | ■         | ■         | ■         | ■         | ■         | ■         |
| trnG (GCC)            | ■         | ■         | ■         | ■         | ■         | ■         | ■         | ■         | ■         | ■         |
| trnG (UCC)            | ■         | ■         | ■         | ■         | ■         | ■         | ■         | ■         | ■         | ■         |
| trnH (GUG)            | ■         | ■         | ■         | ■         | ■         | ■         | ■         | ■         | ■         | ■         |
| trnI (GAU)            | ■         | ■         | ■         | ■         | ■         | ■         | ■         | ■         | ■         | ■         |
| trnI (GAU)            |           | ■         | ■         | ■         | ■         | ■         | ■         | ■         | ■         | ■         |
| trnI (GAU)            |           |           |           |           | ■         |           |           |           |           |           |
| trnI (CAU)            |           |           |           |           |           | ■         | ■         | ■         | ■         | ■         |
| trnK (UUU)            | ■         | ■         | ■         | ■         | ■         | ■         | ■         | ■         | ■         | ■         |
| trnK (UUU)            | ■         |           |           |           |           |           |           |           |           |           |
| trnL(CAA)             |           |           | ■         |           | ■         | ■         |           |           |           | ■         |
| trnL(CAA)             |           |           | ■         |           | ■         | ■         |           |           |           |           |
| trnL (UAA)            | ■         | ■         |           | ■         |           | ■         | ■         | ■         | ■         | ■         |
| trnL (UAG)            |           | ■         |           | ■         |           | ■         | ■         | ■         | ■         | ■         |
| trnM (CAU)            | ■         | ■         | ■         | ■         | ■         | ■         | ■         | ■         | ■         | ■         |
| trnM (CAU)            | ■         | ■         | ■         | ■         | ■         | ■         | ■         | ■         | ■         | ■         |
| trnM (CAU)            | ■         | ■         |           |           | ■         |           |           |           |           |           |
| trnN (GUU)            | ■         | ■         | ■         | ■         | ■         | ■         | ■         | ■         | ■         | ■         |
| trnP (UGG)            | ■         | ■         | ■         | ■         | ■         | ■         | ■         | ■         | ■         | ■         |
| trnQ (UUG)            | ■         | ■         | ■         | ■         | ■         | ■         | ■         | ■         | ■         | ■         |
| trnQ (UUG)            | ■         |           |           |           |           |           |           |           |           |           |
| trnR (ACG)            | ■         | ■         | ■         | ■         | ■         | ■         | ■         | ■         | ■         | ■         |
| trnR (AGA)            |           | ■         | ■         |           | ■         |           |           |           |           |           |
| trnR(UCG)             | ■         |           |           |           |           | ■         |           |           |           |           |
| trnR(CCG)             |           |           |           |           |           |           |           |           |           | ■         |
| trnR(CCU)             |           |           |           |           |           |           |           | ■         |           |           |
| trnR(UCU)             | ■         |           |           | ■         |           | ■         | ■         | ■         | ■         | ■         |
| trnS (GCU)            | ■         | ■         | ■         | ■         | ■         | ■         | ■         | ■         | ■         | ■         |
| trnS(GGA)             |           |           | ■         |           | ■         | ■         |           | ■         |           | ■         |
| trnS (UGA)            | ■         | ■         |           | ■         |           | ■         | ■         | ■         | ■         | ■         |
| trnT (UGU)            | ■         | ■         | ■         | ■         | ■         | ■         | ■         | ■         | ■         | ■         |
| trnT(GGU)             |           |           |           |           |           |           |           |           |           | ■         |
| trnV (UAC)            | ■         | ■         | ■         | ■         | ■         | ■         | ■         | ■         | ■         | ■         |
| trnW (CCA)            | ■         | ■         | ■         | ■         | ■         | ■         | ■         | ■         | ■         | ■         |
| trnY (GUA)            | ■         | ■         | ■         | ■         | ■         | ■         | ■         | ■         | ■         | ■         |

10  
11 *Pu*, *Polytoma uvella*; *Cr*, *Chlamydomonas reinhardtii*; *Cl*, *Chlamydomonas leiostraca*; *Ca* *Chlamydomonas*  
12 *applanata*; *Ds*, *Dunaliella salina*; *Ch*, *Characiochloris acuminata*; *Og*, *Oogamochlamys gigantean*; *HI*,  
13 *Hafniomonas laevis*; *PI*, *Phacotus lenticularis*; *Ep*, *Ettlia pseudoalveolaris*  
14  
15

16  
17

**Table S2. Pairwise sequence identity between non-ribosomal plastid-encoded proteins**

| Protein        | Length average ( $\pm$ SD) | Sequence identity (percentage) |                 |                 |                 |                 |
|----------------|----------------------------|--------------------------------|-----------------|-----------------|-----------------|-----------------|
|                |                            | CI vs Ca                       | CI vs Pu        | Ca vs Pu        | CI vs Cr        | Ca vs Cr        |
| RpoA           | 562.0 $\pm$ 25.2           | 46.2                           | 27.1            | 26.8            | 29.1            | 27.9            |
| RpoB2          | 804.7 $\pm$ 91.5           | 52.7                           | 38.7            | 41.4            | 39.7            | 42.7            |
| RpoB1          | 842.7 $\pm$ 61.5           | 63.8                           | 45.1            | 41              | 54.1            | 48.2            |
| RpoC1          | 1,547.0 $\pm$ 54.5         | 46.4                           | 25              | 27              | -               | -               |
| RpoC2          | 2,144.7 $\pm$ 688.6        | 40.2                           | 22              | 23.1            | 21.2            | 26              |
| YCF1           | 2,154.3 $\pm$ 198.9        | 61.2                           | 41.1            | 40              | 38.2            | 36.83           |
| Tu-1           | 421.3 $\pm$ 4.2            | 95.5                           | 82.2            | 81.1            | 93.5            | 90.7            |
| FTSH           | 3,260.7 $\pm$ 444.6        | 36.1                           | 22.6            | 24.2            | 23.2            | 22.5            |
| CLPP           | 522.7 $\pm$ 32.7           | 76.7                           | 51.7            | 52.8            | 59.9            | 60.5            |
| <b>Average</b> |                            | 57.6 $\pm$ 19.0                | 39.5 $\pm$ 19.2 | 39.7 $\pm$ 18.5 | 44.9 $\pm$ 23.9 | 44.1 $\pm$ 22.6 |

18  
19  
20  
21  
22  
23  
24  
25  
26  
27  
28  
29  
30  
31  
32  
33  
34  
35  
36  
37  
38  
39  
40  
41  
42  
43  
44  
45  
46  
47  
48  
49  
50  
51  
52  
53  
54  
55  
56  
57  
58  
59  
60  
61  
62  
63  
64  
65  
66  
67  
68  
69  
70  
71

**Pu**, *Polytoma uvella*; **CI**, *Chlamydomonas leiostraca*; **Ca** *Chlamydomonas applanata*; **Cr**, *Chlamydomonas reinhardtii*,

72  
73  
74  
75**Table S3.** Average Illumina read-coverage in coding regions of plastid and nuclear contigs of *Polytoma uvella*

|                                              | Coverage (reads/nt)  |
|----------------------------------------------|----------------------|
| <b>Plastid protein-coding genes</b>          |                      |
| <i>rpoC1</i> (scaffold III)                  | 7,306                |
| <i>rpoC2</i> (scaffold I)                    | 5,656                |
| <i>rps7</i>                                  | 6,276                |
| <i>rps14</i>                                 | 5,699                |
| <i>rps11</i>                                 | 6,111                |
| <i>tufA</i>                                  | 5,522                |
| <i>rps3</i>                                  | 5,924                |
| <i>rpl36</i>                                 | 5,052                |
| <i>rps18</i>                                 | 5,950                |
| <i>rpl20</i>                                 | 5,128                |
| <i>rps8</i>                                  | 5,579                |
| <i>rpl5</i>                                  | 4,851                |
| <i>rpl14</i>                                 | 5,213                |
| <i>rpl16</i>                                 | 5,054                |
| <i>rpoA</i>                                  | 5,429                |
| <i>rps4</i>                                  | 6,050                |
| <i>rps12</i>                                 | 5,606                |
| <i>rpoBb</i>                                 | 5,328                |
| <i>rpoBa</i>                                 | 5,067                |
| <i>rps9</i>                                  | 5,999                |
| <i>rps19</i>                                 | 6,536                |
| <i>rpl2</i>                                  | 5,656                |
| <i>ftsH</i>                                  | 6,768                |
| <i>clpP</i>                                  | 6,228                |
| <i>Mean value</i>                            | <b>5,776 ± 601</b>   |
| <b>Plastid rRNA-coding genes<sup>1</sup></b> |                      |
| <i>rrnS-1</i> (scaffold II)                  | 5,622                |
| <i>rrnS-2</i>                                | 6,203                |
| <i>rrnS-3</i>                                | 6,523                |
| <i>rrnL-1</i>                                | 5,854                |
| <i>rrnL-2</i>                                | 6,969                |
| <i>rrnL-3</i>                                | 6,333                |
| <i>rrnL-4</i>                                | 6,708                |
| <i>rrnL-5</i>                                | 6,226                |
| <i>rrnL-6</i>                                | 6,077                |
| <i>rrnL-7</i>                                | 4,032                |
| <i>rrnL-8</i>                                | 5,759                |
| <i>rrnL-9</i>                                | 5,490                |
| <i>rrnL-10</i>                               | 5,388                |
| <i>rrnL-11</i>                               | 5,662                |
| <i>Mean value</i>                            | <b>5,917.6 ± 716</b> |
| <b>Nuclear sequences</b>                     |                      |
| <b>Protein-coding regions</b>                |                      |
| Ferredoxin sulfite reductase                 | 36                   |
| Ferredoxin-NADP reductase                    | 29                   |
| Pyruvate-ferredoxin oxidoreductase           | 37                   |
| Apoferredoxin                                | 37                   |
| Glutamate synthase                           | 62                   |

| <b>Protein-coding regions plus intronic sequences</b>   |                 |
|---------------------------------------------------------|-----------------|
| DNA repair protein RAD51                                | 31              |
| Structural maintenance of chromosomes protein 2 (SMC2)  | 30              |
| Starch branching enzyme (SBE2)                          | 31              |
| Topoisomerase-like (Spo11)                              | 30              |
| RNA polymerase III subunit 2                            | 33              |
| Translation initiation factor (EIF1A)                   | 34              |
| V-ATPase subunit a                                      | 33              |
| DNA mismatch repair protein Msh3 (MSH3)                 | 33              |
| DNA mismatch repair protein Msh4 (MSH4)                 | 34              |
| <b>Genomic fragments randomly selected (size in bp)</b> |                 |
| 102,471                                                 | 33              |
| 78,401                                                  | 35              |
| 28,968                                                  | 34              |
| 23,841                                                  | 33              |
| 50,557                                                  | 34              |
| 7,914                                                   | 56              |
| 4,860                                                   | 31              |
| <i>Mean value</i>                                       | <b>38.6 ± 8</b> |

76  
77

1. Only considering rRNA coding regions (see supplementary Figure 3A).
